# Supplementary material for: Advancements in monitoring: a comparison of traditional and application-based tools for measuring outdoor recreation
Source: PeerJ journal article supplement (doi:10.7717/peerj.17744), 2024-09-10
Supplement: Table_S1.pdf [file Table_S1.pdf]

**Table S1. Number of pairwise combinations of camera, counter, and Strava Metro spatially matched locations for all recreation activities, biking, and pedestrian (hike, run, walk).**

Cameras and counters were matched if devices were within 200 m of each other along a trail and had data on the same day. Cameras and counters were matched to Strava Metro segments within 30 m of devices and had data on the same day.

| <b>Activity type</b> | <b>Number of spatially matched locations</b> |                         |                          |
|----------------------|----------------------------------------------|-------------------------|--------------------------|
|                      | Camera and counter                           | Camera and Strava Metro | Counter and Strava Metro |
| All activities       | 58                                           | 156                     | 189                      |
| Pedestrian           | 60                                           | 157                     | 184                      |
| Biking               | 11                                           | 102                     | 36                       |
